# Supplementary material for: Gene-based analysis in HRC imputed genome wide association data identifies three novel genes for Alzheimer’s disease
Source: PubMed Central journal article supplement (PMC6613773; doi:10.1371/journal.pone.0218111), 2019-07-08
Supplement: pone.0218111.s002.pdf [file pone.0218111.s002.pdf]

S1 Table. POLARIS Gene-Based Results for GWAS Associated Genes

| Gene            | Chr | No. of SNPs | Beta   | SE     | P-value               |
|-----------------|-----|-------------|--------|--------|-----------------------|
| <i>CR1</i>      | 1   | 288         | 0.228  | 0.0827 | 0.0059                |
| <i>BIN1</i>     | 2   | 342         | 0.322  | 0.0848 | 0.0001                |
| <i>INPP5D</i>   | 2   | 474         | 0.005  | 0.0670 | 0.9449                |
| <i>MEF2C</i>    | 5   | 369         | -0.032 | 0.0672 | 0.6375                |
| <i>HLA-DRB5</i> | 6   | 9           | 1.308  | 0.3495 | 0.0002                |
| <i>CD2AP</i>    | 6   | 414         | 0.237  | 0.0654 | 0.0003                |
| <i>NME8</i>     | 7   | 398         | 0.060  | 0.0922 | 0.5140                |
| <i>ZCWPQ1</i>   | 7   | 81          | 0.168  | 0.2009 | 0.4031                |
| <i>EPHA1</i>    | 7   | 59          | 0.374  | 0.1649 | 0.0235                |
| <i>PTK2B</i>    | 8   | 492         | 0.035  | 0.0576 | 0.5446                |
| <i>CLU</i>      | 8   | 158         | 0.461  | 0.0988 | $3.0 \times 10^{-6}$  |
| <i>CELF1</i>    | 11  | 162         | 0.445  | 0.1508 | 0.0031                |
| <i>MS4A6A</i>   | 11  | 102         | 0.288  | 0.0873 | 0.0010                |
| <i>PICALM</i>   | 11  | 436         | 0.240  | 0.0943 | 0.0109                |
| <i>SORL1</i>    | 11  | 347         | -0.119 | 0.0617 | 0.0540                |
| <i>FERMT2</i>   | 14  | 246         | 0.215  | 0.1562 | 0.1680                |
| <i>SLC24A4</i>  | 14  | 587         | 0.266  | 0.1475 | 0.0711                |
| <i>RIN3</i>     | 14  | 506         | 0.436  | 0.1897 | 0.0216                |
| <i>DSG2</i>     | 18  | 273         | -0.155 | 0.1411 | 0.2726                |
| <i>ABCA7</i>    | 19  | 76          | 0.541  | 0.1265 | $1.94 \times 10^{-5}$ |
| <i>CD33</i>     | 19  | 60          | 0.095  | 0.2527 | 0.7066                |
| <i>CASS4</i>    | 20  | 193         | 0.214  | 0.1734 | 0.2165                |
