# Supplementary material for: Gene-based analysis in HRC imputed genome wide association data identifies three novel genes for Alzheimer’s disease
Source: PubMed Central journal article supplement (PMC6613773; doi:10.1371/journal.pone.0218111), 2019-07-08
Supplement: pone.0218111.s003.pdf [file pone.0218111.s003.pdf]

**S2 Table. Gene-Wide Significant Genes from POLARIS Gene-based Analysis Conditioned on *APOE* and *BCAM* and best IGAP SNP and p-value**

| Chr | Gene                | No. of SNPs | POLARIS, conditioned on <i>APOE</i> and <i>BCAM</i> |        |                      | IGAP        |                         |
|-----|---------------------|-------------|-----------------------------------------------------|--------|----------------------|-------------|-------------------------|
|     |                     |             | Beta                                                | SE     | P-value              | SNP         | P-value                 |
| 4   | <i>PPARGC1A</i>     | 480         | 0.896                                               | 0.1896 | $2.3 \times 10^{-6}$ | rs11734408  | 0.001345                |
| 8   | <i>SCARA3 (CLU)</i> | 240         | 0.549                                               | 0.1097 | $5.6 \times 10^{-7}$ | rs7982      | $2.48 \times 10^{-7}$   |
| 15  | <i>RORA</i>         | 1813        | 0.347                                               | 0.0693 | $5.6 \times 10^{-7}$ | 15-61211520 | $5.26 \times 10^{-6}$   |
| 16  | <i>ZNF423</i>       | 1056        | 0.549                                               | 0.1194 | $4.3 \times 10^{-6}$ | 16-49888847 | 0.0003226               |
| 19  | <i>BCL3</i>         | 88          | 0.167                                               | 0.0676 | 0.0133               | rs12459810  | $6.77 \times 10^{-43}$  |
| 19  | <i>CBL3</i>         | 50          | 0.151                                               | 0.1243 | 0.2237               | rs2889414   | $2.49 \times 10^{-43}$  |
| 19  | <i>BCAM</i>         | 71          | NA                                                  | NA     | NA                   | rs28399637  | $4.66 \times 10^{-69}$  |
| 19  | <i>PVRL2</i>        | 160         | 0.255                                               | 0.0644 | $7.4 \times 10^{-5}$ | rs6857      | $2.50 \times 10^{-575}$ |
| 19  | <i>TOMM40</i>       | 108         | 0.335                                               | 0.0897 | 0.0002               | rs6857      | $2.50 \times 10^{-575}$ |
| 19  | <i>APOE</i>         | 55          | NA                                                  | NA     | NA                   | rs6857      | $2.50 \times 10^{-575}$ |
| 19  | <i>APOC1</i>        | 34          | -0.146                                              | 0.1045 | 0.1621               | rs6857      | $2.50 \times 10^{-575}$ |
| 19  | <i>APOC4-APOC2</i>  | 62          | 0.435                                               | 0.0897 | $1.2 \times 10^{-6}$ | rs429358    | $6.70 \times 10^{-536}$ |
