# Supplementary material for: Gene-based analysis in HRC imputed genome wide association data identifies three novel genes for Alzheimer’s disease
Source: PubMed Central journal article supplement (PMC6613773; doi:10.1371/journal.pone.0218111), 2019-07-08
Supplement: pone.0218111.s004.pdf [file pone.0218111.s004.pdf]

**S3 Table. GERAD Cohort Descriptives and Sample Size**

|                          | TOTAL | MRC  | ART  | BONN | WASHU | NIMN | UCL-Laser | UCL-PRION | HNR  | 1958C | NBS  | KORA |
|--------------------------|-------|------|------|------|-------|------|-----------|-----------|------|-------|------|------|
| <b>AD Cases</b>          |       |      |      |      |       |      |           |           |      |       |      |      |
| <i>n<sub>total</sub></i> | 3332  | 1009 | 960  | 555  | 423   | 127  | 47        | 211       | 0    | 0     | 0    | 0    |
| % Female                 | 63.7  | 70.4 | 60.9 | 63.8 | 56    | 63   | 74.5      | 58.3      | -    | -     | -    | -    |
| Mean Age                 | 77.9  | 80.9 | 76.6 | 72.9 | 82.1  | 80.1 | 80.6      | 63.6      | -    | -     | -    | -    |
| <b>Controls</b>          |       |      |      |      |       |      |           |           |      |       |      |      |
| <i>n<sub>total</sub></i> | 9832  | 873  | 82   | 37   | 233   | 0    | 0         | 0         | 353  | 5343  | 2477 | 434  |
| % Female                 | 51.6  | 61.6 | 59.8 | 64.9 | 66.5  | -    | -         | -         | 53   | 49.8  | 50.5 | 49.1 |
| Mean Age                 | 51.1  | 75.9 | 77.9 | 79.5 | 78.5  | -    | -         | -         | 54.6 | 45    | -    | 56   |
| Total by cohort          | 13164 | 1882 | 1042 | 592  | 656   | 127  | 47        | 211       | 353  | 5343  | 2477 | 434  |
